# Supplementary material
Source: Royal Society of Chemistry journal article supplement (doi:10.1039/d5ce01141h)
Supplement: d5ce01141h1.pdf [file d5ce01141h1.pdf]

## Electronic Supplementary Information (ESI)

### **Metal-ion-dependent polarity switching and dielectric enhancement in solvent-vapour-responsive mononuclear complexes**

Fumiya Kobayashi<sup>\*,a</sup>, Hiroki Iwase<sup>a</sup>, Shoma Hoshino<sup>b</sup> and Makoto Tadokoro<sup>\*,a</sup>

<sup>a</sup> Department of Chemistry, Faculty of Science, Tokyo University of Science, 1-3 Kagurazaka, Shinjuku-ku, Tokyo 162-8601, Japan.

<sup>b</sup> Department of Chemistry, School of Science, Kitazato University, 1-15-1 Kitazato, Minami-ku, Sagamihara-shi Kanagawa 252-0373, Japan.

Corresponding author:

F. Kobayashi, [fkobayashi@rs.tus.ac.jp](mailto:fkobayashi@rs.tus.ac.jp)

M. Tadokoro, [tadokoro@rs.tus.ac.jp](mailto:tadokoro@rs.tus.ac.jp)

**Table S1.** Crystallographic data for 1–4.

| Compound                                                                    | 1                                                               | 2                                                               | 3                                                                 | 4                                                                 |
|-----------------------------------------------------------------------------|-----------------------------------------------------------------|-----------------------------------------------------------------|-------------------------------------------------------------------|-------------------------------------------------------------------|
| Temperature / K                                                             | 173                                                             | 90                                                              | 90                                                                | 90                                                                |
| Formula                                                                     | C <sub>18</sub> H <sub>19</sub> N <sub>2</sub> FeO <sub>5</sub> | C <sub>18</sub> H <sub>19</sub> N <sub>2</sub> MnO <sub>5</sub> | C <sub>19</sub> H <sub>21</sub> N <sub>2</sub> FeO <sub>5</sub> S | C <sub>19</sub> H <sub>21</sub> N <sub>2</sub> MnO <sub>5</sub> S |
| Crystal system                                                              | Monoclinic                                                      | Monoclinic                                                      | Monoclinic                                                        | Triclinic                                                         |
| Space group                                                                 | <i>P2<sub>1</sub>/c</i> (#14)                                   | <i>P2<sub>1</sub>/c</i> (#14)                                   | <i>Cc</i> (#9)                                                    | <i>P</i> -1 (#2)                                                  |
| <i>a</i> / Å                                                                | 12.4010(10)                                                     | 12.5148(5)                                                      | 15.3544(5)                                                        | 8.8350(3)                                                         |
| <i>b</i> / Å                                                                | 16.4977(13)                                                     | 16.7477(7)                                                      | 17.1176(5)                                                        | 10.5064(3)                                                        |
| <i>c</i> / Å                                                                | 8.6621(7)                                                       | 8.7014(3)                                                       | 7.9303(2)                                                         | 10.7201(4)                                                        |
| <i>α</i> / °                                                                | 90                                                              | 90                                                              | 90                                                                | 90.9370(10)                                                       |
| <i>β</i> / °                                                                | 101.098(3)                                                      | 102.542(2)                                                      | 106.9600(10)                                                      | 102.4160(10)                                                      |
| <i>γ</i> / °                                                                | 90                                                              | 90                                                              | 90                                                                | 91.6090(10)                                                       |
| <i>V</i> / Å <sup>3</sup>                                                   | 1739.0(2)                                                       | 1780.24(12)                                                     | 1993.67(10)                                                       | 971.17(6)                                                         |
| <i>Z</i>                                                                    | 4                                                               | 4                                                               | 4                                                                 | 2                                                                 |
| <i>D</i> <sub>calc</sub> / g cm <sup>-3</sup>                               | 1.525                                                           | 1.486                                                           | 1.484                                                             | 1.520                                                             |
| <i>μ</i> / mm <sup>-1</sup>                                                 | 0.899                                                           | 0.773                                                           | 0.894                                                             | 0.821                                                             |
| <i>F</i> (000)                                                              | 828                                                             | 824                                                             | 924                                                               | 460                                                               |
| <i>R</i> <sub>1</sub> , <i>wR</i> <sub>2</sub> ( <i>I</i> > 2σ( <i>I</i> )) | 0.0433, 0.1138                                                  | 0.0363, 0.0902                                                  | 0.0289, 0.0723                                                    | 0.0321, 0.0752                                                    |
| <i>R</i> <sub>1</sub> , <i>wR</i> <sub>2</sub> (for all data)               | 0.0493, 0.1190                                                  | 0.0413, 0.940                                                   | 0.0293, 0.0726                                                    | 0.0337, 0.0761                                                    |
| GOF                                                                         | 1.058                                                           | 1.065                                                           | 1.026                                                             | 1.073                                                             |
| Reflections/Parameters                                                      | 3000/241                                                        | 3137/385                                                        | 3283/402                                                          | 3198/402                                                          |
| Flack                                                                       | -                                                               | -                                                               | 0.068(11)                                                         | -                                                                 |
| CCDC                                                                        | 2512678                                                         | 2512679                                                         | 2512680                                                           | 2512681                                                           |

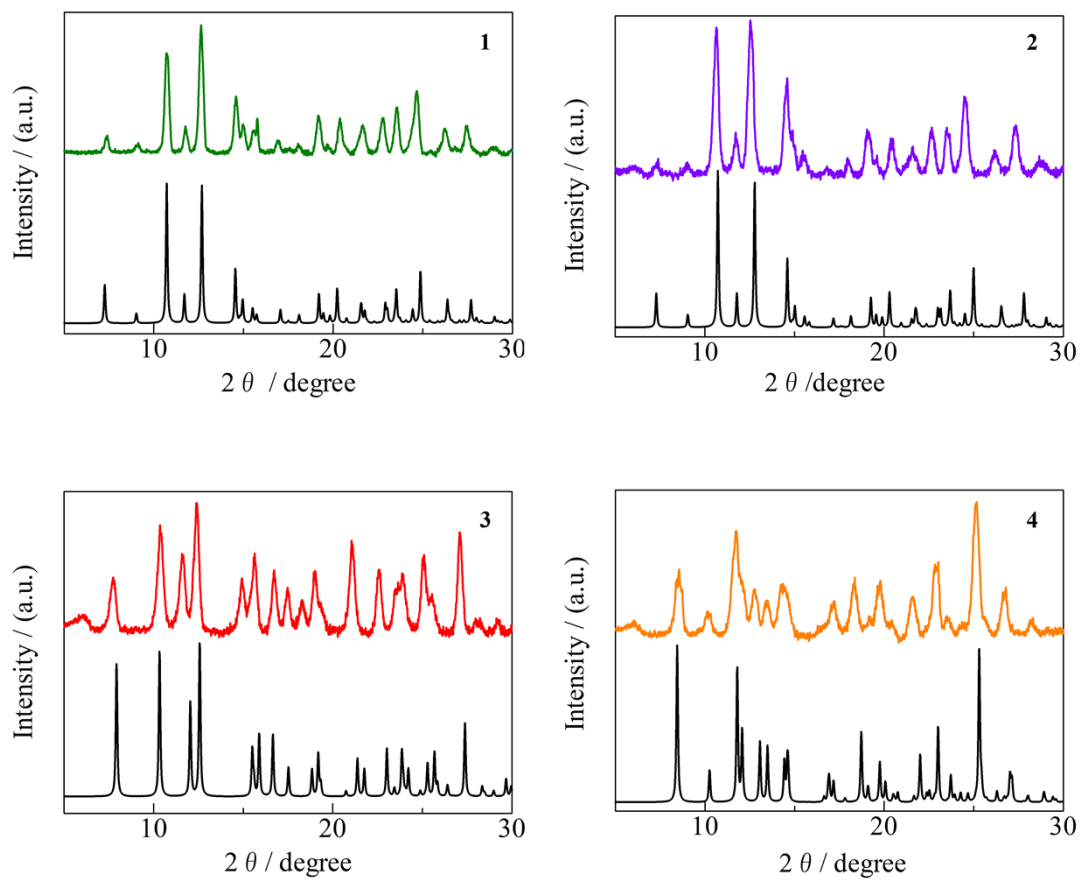

**Figure S1.** PXRD patterns for the crystalline sample of 1–4 at 298 K and their simulations (black).

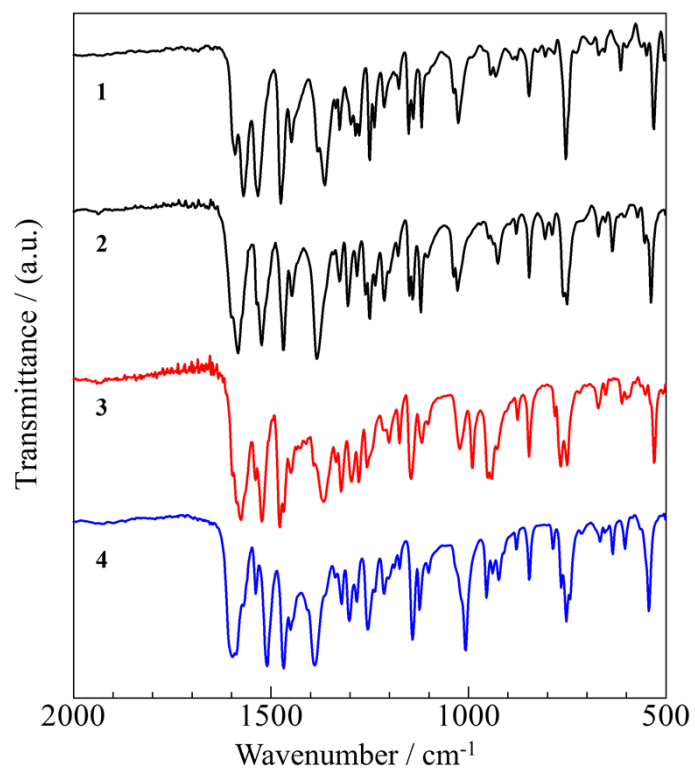

**Figure S2.** FT-IR spectra for **1–4**. Peaks observed at 1020 cm<sup>-1</sup> for **3** and **4** are attributed to the S=O vibrations of DMSO.

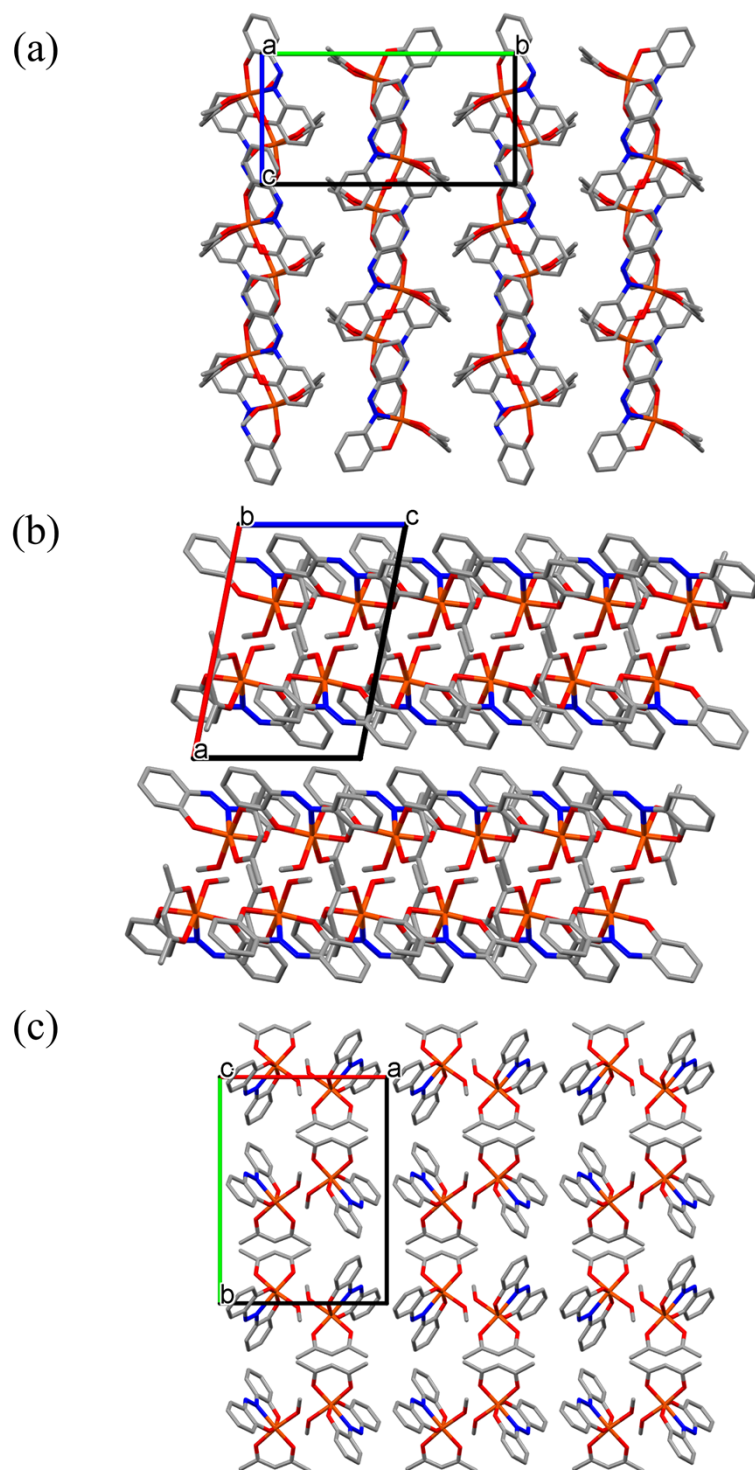

**Figure S3.** Crystal packing structures for **1** at 173 K along (a) *a*, (b) *b*, (c) *c* axes. Hydrogen atoms are omitted for clarity.

***Packing structure***

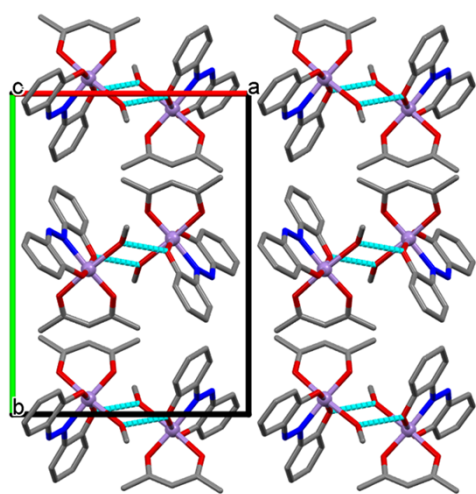

**Non Polar ( $P2_1/c$ )**

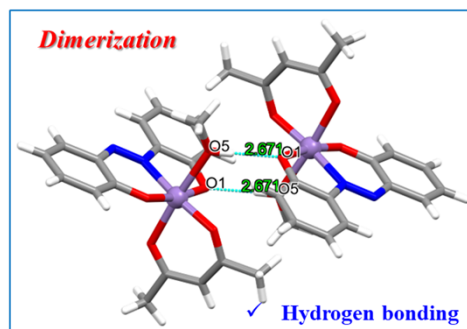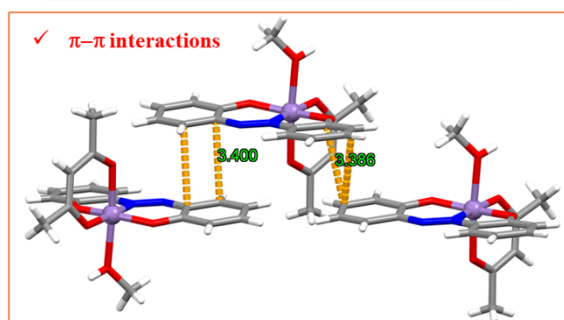

**Figure S4.** Crystal packing structure and intermolecular interactions of **2** at 90 K.

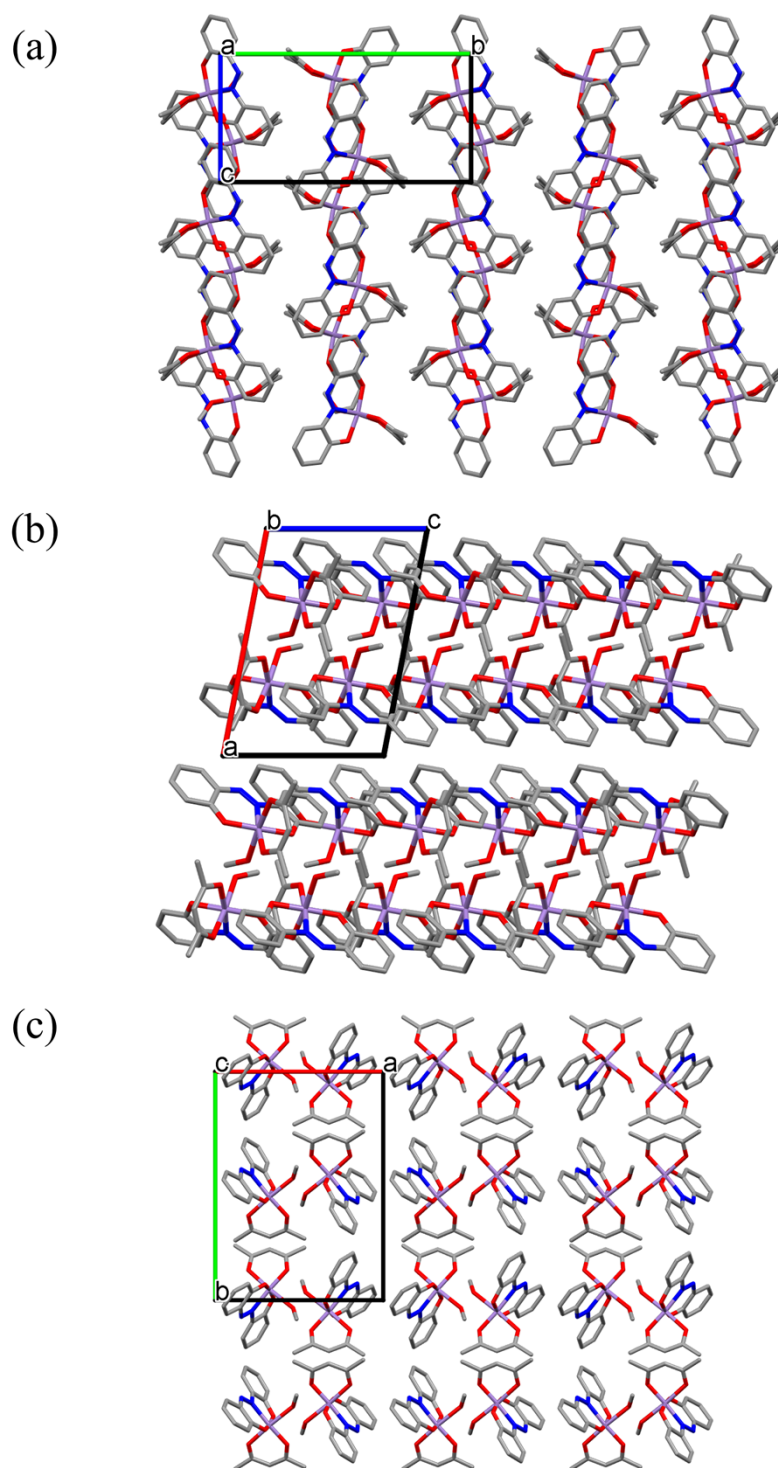

**Figure S5.** Crystal packing structures for **2** at 90 K along (a) *a*, (b) *b*, (c) *c* axes. Hydrogen atoms are omitted for clarity.

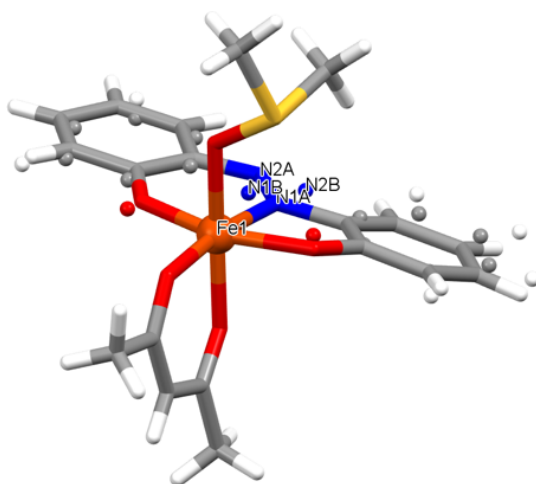

**Figure S6.** Crystal structure for **3** at 90 K with the atom-numbering scheme.

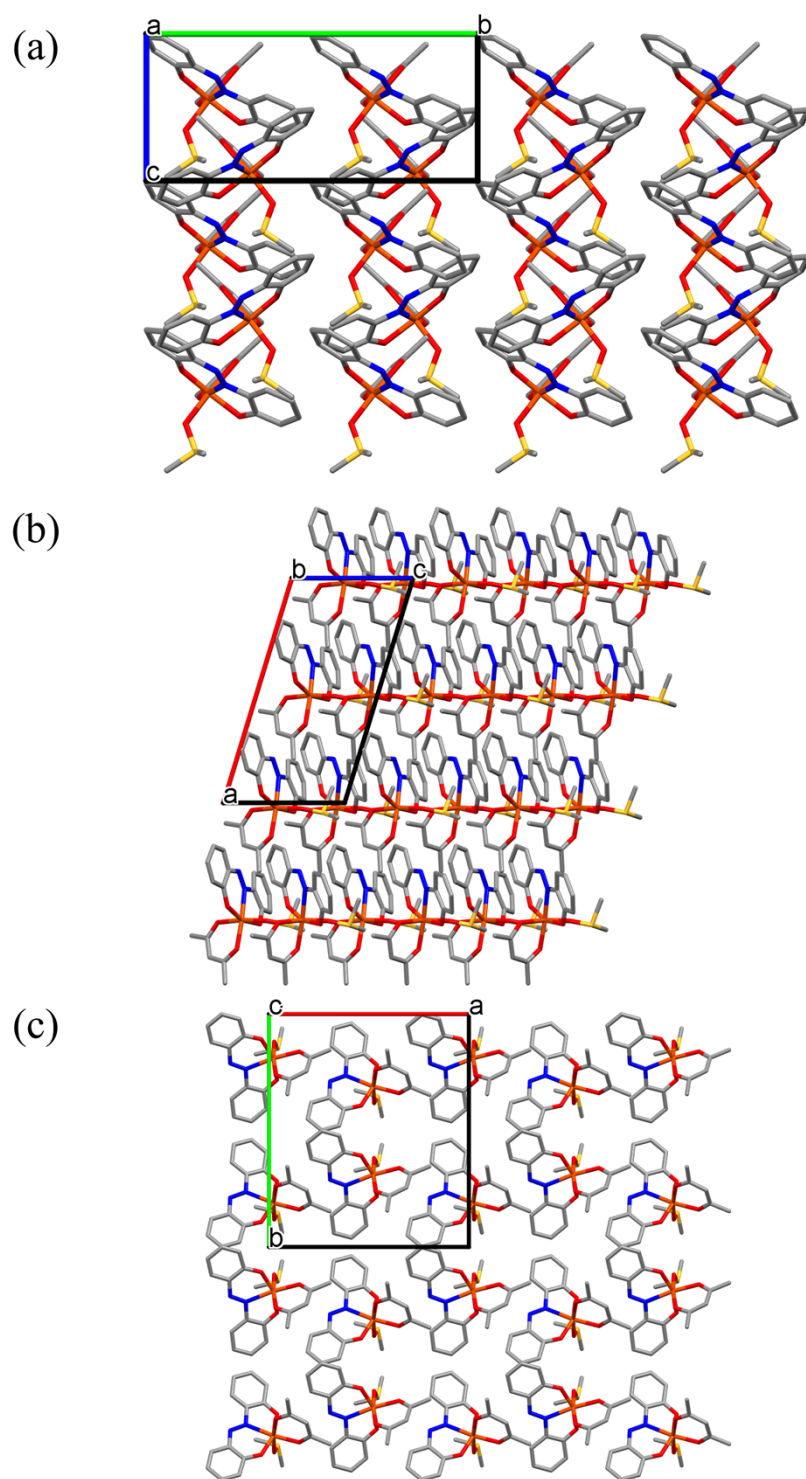

**Figure S7.** Crystal packing structures for **3** at 90 K along (a) *a*, (b) *b*, (c) *c* axes. Hydrogen atoms and disordered atoms are omitted for clarity.

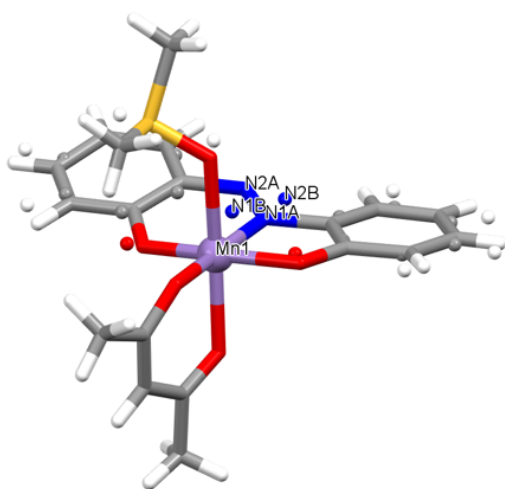

**Figure S8.** Crystal structure for **4** at 90 K with the atom-numbering scheme.

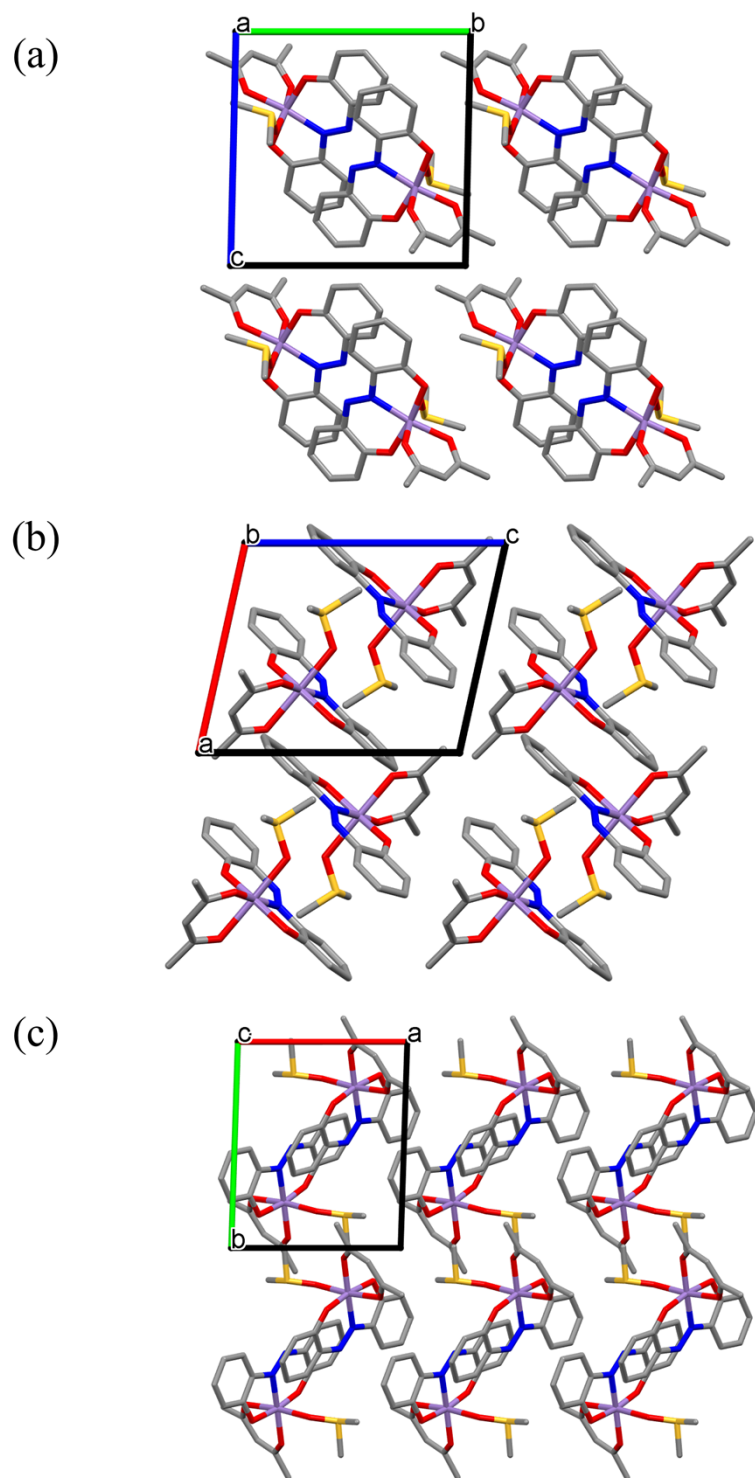

**Figure S9.** Crystal packing structures for **4** at 90 K along (a) *a*, (b) *b*, (c) *c* axes. Hydrogen atoms and disordered atoms are omitted for clarity.

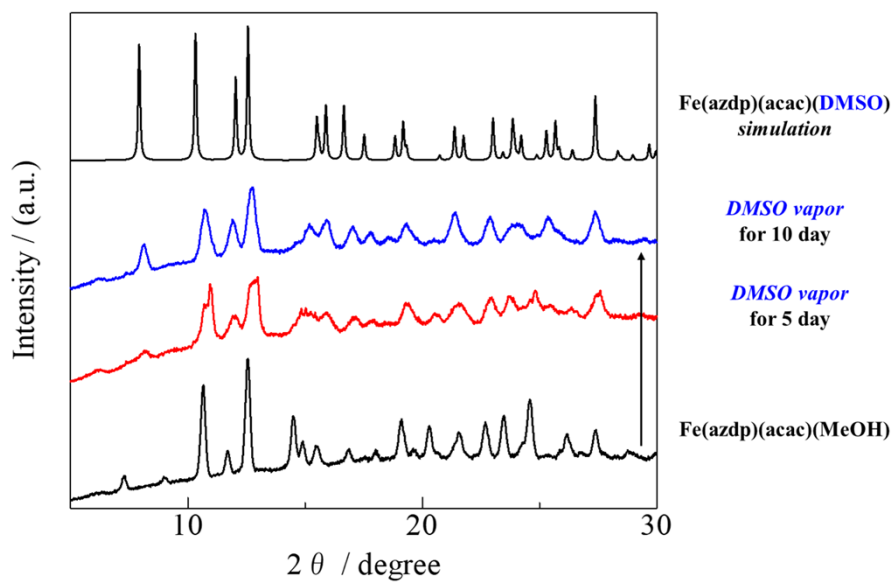

**Figure S10.** PXRD patterns for **1** and DMSO-vapor exposed samples (**1'**).

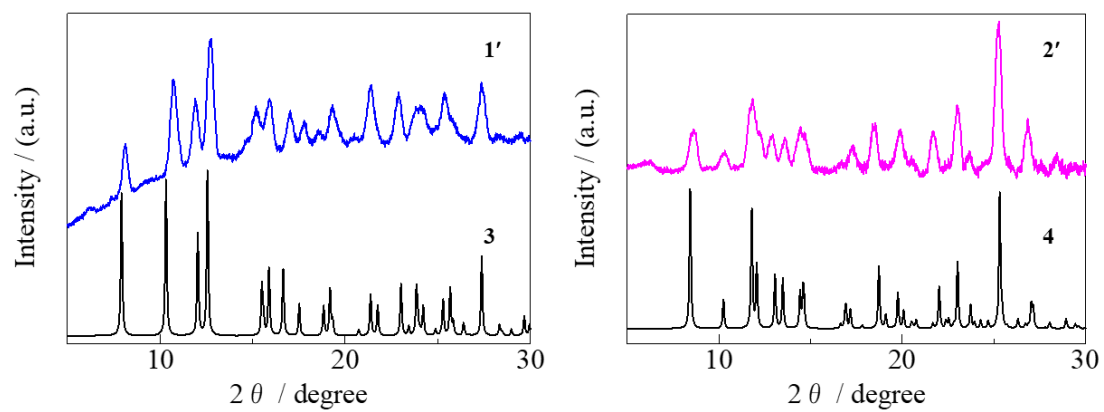

**Figure S11.** PXRD patterns for the crystalline samples of **1'** (blue) and **2'** (pink) at 298 K and the simulations for **3** and **4** (black).

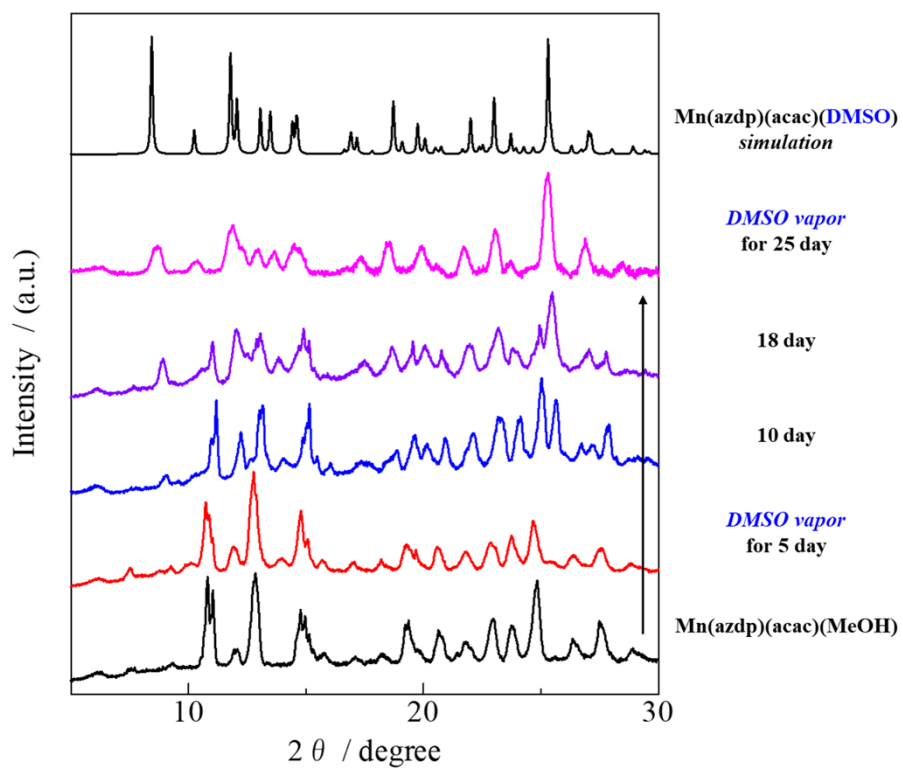

**Figure S12.** PXRD patterns for **2** and DMSO-vapor exposed samples (**2'**).

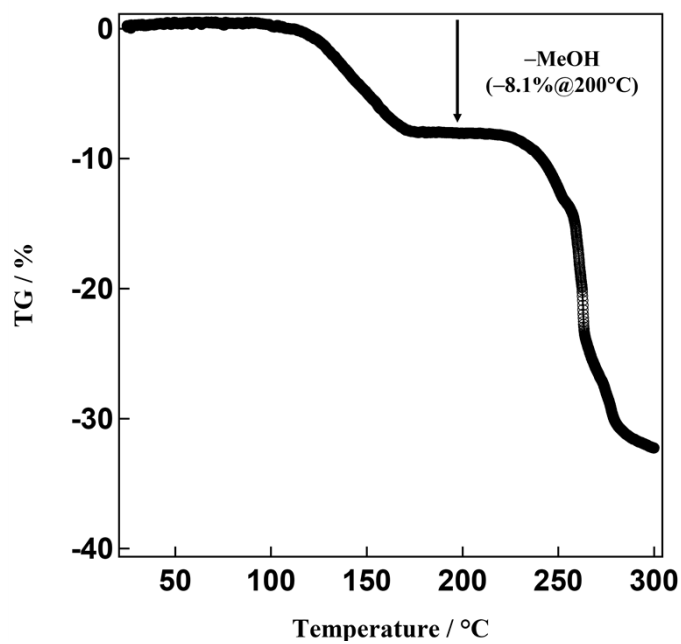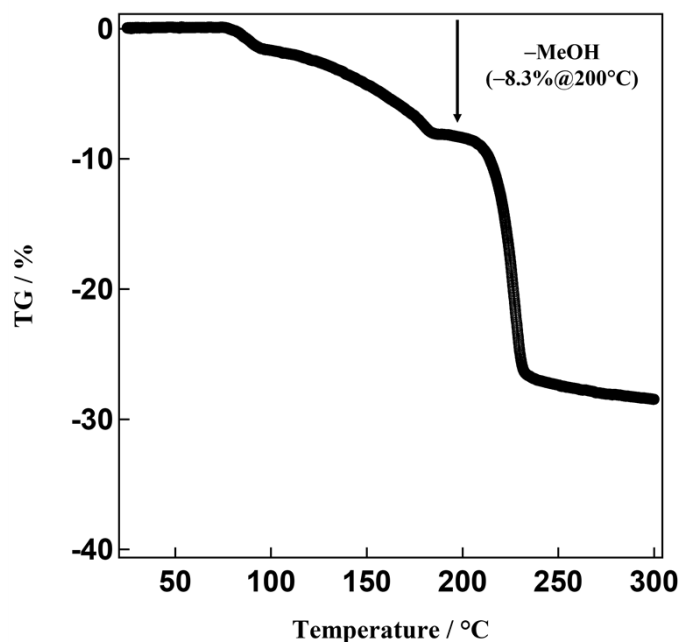

**Figure S13.** TGA curve for (top) **1** and (bottom) **2**. 8.1% and 8.3% weight losses were observed for **1** and **2** above 200 °C, respectively. This shows good agreement with the MeOH contents of **1** and **2** (MeOH = 8.0%). The weight loss over 250 °C corresponds to the decomposition of complexes.

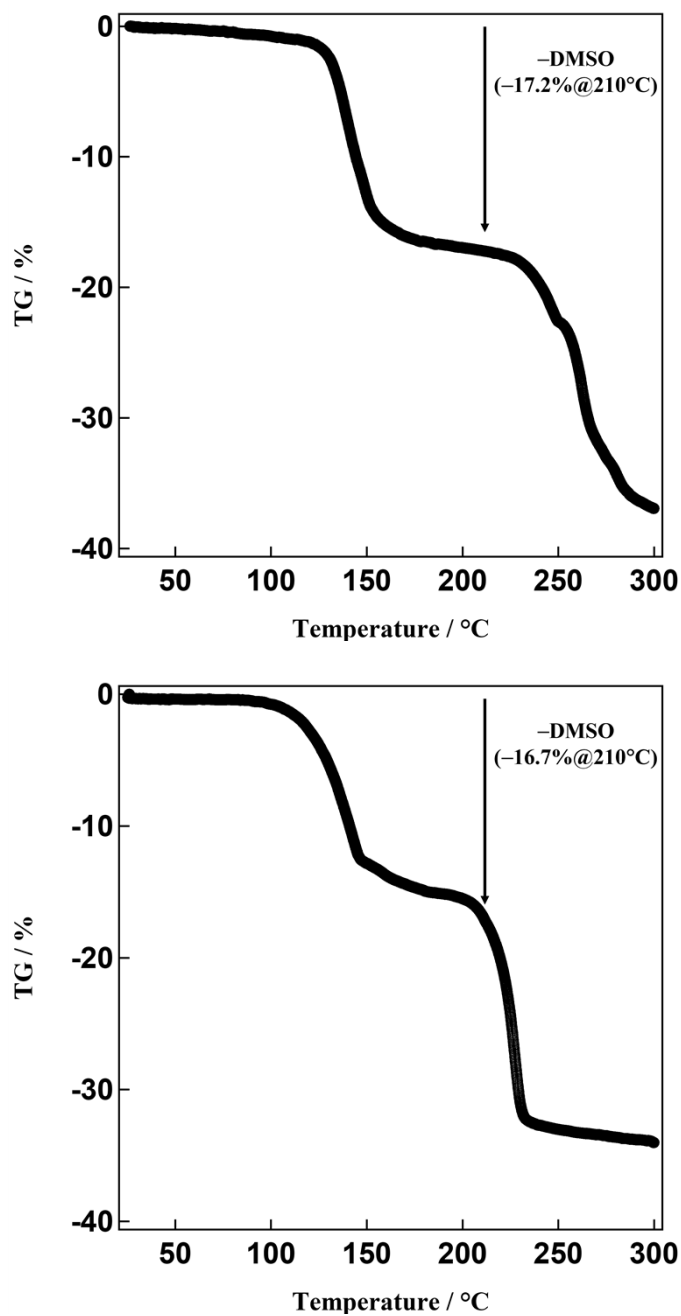

**Figure S14.** TGA curve for (top) **1'** and (bottom) **2'**. 17.2% and 16.7% weight loss were observed for **1'** and **2'** above 210 °C, respectively. This shows good agreement with the DMSO content of **1'** and **2'** (DMSO = 17.5%), respectively. The weight loss over 250 °C corresponds to the decomposition of complexes.
